1  
2  
3  
4  
5  
6  
7  
8  
9  
10  
11  
12  
13  
14  
15  
16  
17  
18  
19  
20  
21  
22

**Selection on morphological traits and fluctuating asymmetry by a fungal parasite in the yellow dung fly**

WOLF U. BLANCKENHORN

*Department of Evolutionary Biology and Environmental Studies, University of Zürich,*

*Winterthurerstrasse 190, CH-8057 Zürich, Switzerland; Fax: +41 44 635.4780; E-mail:*

*wolf.blanckenhorn@ieu.uzh.ch*

3 Figures; 1 Table.

Word count: Abstract 248; Text: 3426; 75 References 1718

*Running title* Selection by a fungal parasite in dung flies

1 **Abstract** (259 words)  
2

3 Evidence for selective disadvantages of large body size remains scarce in general. Previous  
4 phenomenological studies of the yellow dung fly *Scathophaga stercoraria* have demonstrated  
5 strong positive sexual and fecundity selection on male and female size. Nevertheless, the  
6 body size of flies from a Swiss study population has declined by almost 10% from 1993 to  
7 2009. Given substantial heritability of body size, this negative evolutionary response of a trait  
8 that is measurably positively selected suggests important selective factors being missed. We  
9 took advantage of a periodic epidemic outbreak of the fungus *Entomophthora scatophagae* to  
10 assess selection exerted by this fatal parasite. Fungal infection varied over the season from ca.  
11 50% in the cooler and more humid spring and autumn to almost 0% in summer. The  
12 probability of dying from fungal infection increased with adult body size. Females never laid  
13 any eggs after infection, so there was no fungus effect on female fecundity beyond its impact  
14 on mortality. Large males showed the typical mating advantage in the field, but this pattern of  
15 positive sexual selection was nullified by fungal infection. Mean fluctuating asymmetry of  
16 paired appendages (legs, wings) did not affect the viability, fecundity or mating success of  
17 yellow dung flies in the field. Our study demonstrates rare size-selective parasite-mediated  
18 disadvantages of large adult body size in the field. Reduced ability to combat parasites such  
19 as *Entomophthora* may be an immunity cost of large body size in dung flies, although the  
20 hypothesized trade-off between fluctuating asymmetry, a presumed indicator of  
21 developmental instability and environmental stress, and immunocompetence was not found  
22 here.

23  
24 **Keywords:** body size, developmental stability, *Entomophthora*, fecundity selection,  
25 fluctuating asymmetry, fungal parasite, insect immunity, *Scathophaga stercoraria*, sexual  
26 selection, trade-off, viability selection.

27

## 1 **Introduction**

2 Systematic quantification of selection has become one of the hallmarks of modern biological  
3 research so as to acquire a thorough understanding of the process of natural selection and its  
4 evolutionary consequences. Standardized measures of selection have been available for some  
5 time (Arnold & Wade, 1984a,b; Lande & Arnold, 1983; Brodie *et al.*, 1995) and have been  
6 applied to many species and situations to foster several comparative (meta-)analyses, which  
7 greatly enhanced our understanding of the action of natural selection in the wild (e.g. Endler,  
8 1986; Kingsolver *et al.*, 2001; Kingsolver & Pfennig, 2004; Cox & Calsbeek, 2009).  
9 Phenomenological investigations of selection also are the field method of choice to  
10 understand the evolution and population biology of single species and populations in an  
11 integrative way, and to test hypotheses about the evolution of particular traits and patterns  
12 (e.g. sexual size dimorphism: Blanckenhorn, 2007).

13 The widespread yellow dung fly *Scathophaga stercoraria* (Diptera: Scathophagidae) is a  
14 classic model species for studies of natural, particularly sexual selection (Parker, 1979;  
15 Borgia, 1982; Sigurjónsdóttir & Snorrason, 1995). Phenomenological field studies have  
16 established temporally variable but on average very strong mating advantages of large males,  
17 as well as fecundity advantages of large females (Jann *et al.*, 2000; Blanckenhorn *et al.*, 2003;  
18 cf. Honek, 1993). Strong sexual selection on male body size likely is the main driver of the  
19 untypical male-biased sexual size dimorphism in *S. stercoraria* (Fairbairn, 1997; Kraushaar &  
20 Blanckenhorn, 2002; Blanckenhorn, 2007, 2009). Nevertheless, the body size of flies from  
21 our field population in Switzerland has declined by almost 10% over a 15-year period from  
22 1993 – 2009 (Blanckenhorn, 2015). Given generally substantial heritability of body size also  
23 in this species (Mousseau & Roff, 1987; Blanckenhorn, 2000), this negative evolutionary  
24 response of a trait that is measurably strongly positively selected suggests that we are missing  
25 important selective factors or episodes shaping the body size of yellow dung flies (Merilä *et*

1 al., 2001; Blanckenhorn, 2015; Gotanda et al., 2015). In general, and also for the yellow dung  
2 fly, evidence for selective disadvantages of large body size remains scarce (Blanckenhorn,  
3 2000, 2007).

4 One aspect not well studied in yellow dung flies is size-dependent survival in nature. This  
5 is generally the case for small-bodied invertebrates, for which longitudinal field studies are  
6 essentially impossible because individuals cannot be easily marked and followed in nature, as  
7 is the case for larger vertebrates (Merilä & Hendry, 2014, Schilthuizen & Kellermann, 2014;  
8 Stoks et al., 2014; Blanckenhorn, 2015). At the same time, laboratory longevity estimates  
9 (e.g. Blanckenhorn, 1997; Reim et al., 2006; Blanckenhorn et al., 2007) generally do not well  
10 reflect field mortality. We do have multiple field estimates of larval survivorship at various  
11 conditions suggesting some counter-selection against large body size via the necessarily  
12 longer development time (summarized in Blanckenhorn, 2007). However, sex- and size-  
13 specific adult survivorship in the field was so far estimated only indirectly by Burkhard et al.  
14 (2002) using age-grading by wing injuries. We herewith add a study of natural selection on  
15 morphological traits by the fatal fungal parasite *Entomophthora spp.*

16 The parasitic fungus *Entomophthora scatophagae* regularly infects yellow dung flies in  
17 Europe and North America (Hammer, 1941; Steinkraus & Kramer, 1988; Maitland, 1994;  
18 Steenberg et al., 2001). Primarily at humid conditions infections can be epidemic (pers. obs.),  
19 in which case infected dead flies can be found prominently exposed near cow pastures on  
20 flowers, long grass or fences in a characteristic posture presumably effectively disseminating  
21 fungal spores and/or attracting other flies (Maitland, 1994; Møller, 1993). Spore transmission  
22 likely also occurs via physical contact, e.g. during copulation (Møller, 1993). The fungus is  
23 fierce and effective at infecting and killing insects within hours or days and can be  
24 manipulated, such that related, often species-specific such fungi are being employed for  
25 biological control of insect pests (e.g. Steenberg et al., 2001; Nielsen & Hayek, 2006). We

1 took advantage of a fungus epidemic at our field population near Zürich, Switzerland, in  
2 2002.

3 I here assessed viability, fecundity and sexual selection on morphology and fluctuating  
4 asymmetry. Morphological traits reflecting body size are often assessed in selection studies  
5 (Kingsolver et al., 2001; Kingsolver & Pfennig, 2004; Blanckenhorn, 2007). Body size is one  
6 of the most important quantitative traits of an organism, as it strongly affects most  
7 physiological and fitness traits (Calder, 1984; Schmidt-Nielsen, 1984; Roff, 1992) and  
8 exhibits several prominent evolutionary patterns in many organisms (Rensch, 1950; Fairbairn  
9 1997; Blanckenhorn, 2000; Blanckenhorn & Demont, 2004; Kingsolver & Pfennig, 2004).  
10 Depending on the taxon, diverse traits are typically used as surrogates of body size, which are  
11 usually highly correlated (i.e. integrated) within individuals due to pleiotropy, epistasis or  
12 gene linkage. Nevertheless, for functional reasons selection on various body parts may differ  
13 (e.g. Preziosi & Fairbairn, 2000), producing responses in correlated traits and thus generally  
14 prompting a multivariate approach (Lande & Arnold, 1983). I focused on paired appendages  
15 (legs, wings), so I could also assess fluctuating asymmetry (FA; Palmer & Strobeck, 1986).  
16 Small and random deviations from the a priori perfect symmetry in bilaterally symmetric  
17 organisms, i.e. FA, are presumed to reflect heritable developmental instability, such that  
18 individuals with good genes and/or living in good conditions can produce more symmetric  
19 bodies in the face of environmental stress, ultimately augmenting their fitness. Symmetric  
20 individuals consequently should have greater survival prospects (viability selection), and  
21 should be more successful at acquiring mates (sexual selection: Møller & Swaddle, 1997).  
22 However, especially the latter notion, and the evidence, remain controversial (Møller &  
23 Thornhill, 1997; Palmer, 2000; Polak, 2003; Klingenberg, 2003; Van Dongen, 2006; Knierim  
24 et al., 2007). In yellow dung flies, Liggett *et al.* (1993) and Swaddle (1997) found a negative  
25 relationship between FA and mating and foraging success, respectively, while Floate &

1 Coughlin (2010) found no evidence for FA being a useful biomarker of environmental stress  
2 exerted by toxic livestock medications (ivermectin). Our own previous studies of this species  
3 found that FA is not heritable (Blanckenhorn & Hosken, 2003), that it does not increase with  
4 inbreeding (or homozygosity: Hosken et al., 2000), and that FA does not affect male mating  
5 success in the field, while nevertheless being negatively related to energy reserves  
6 (Blanckenhorn et al., 2003). Of central relevance here is the postulated link between FA and  
7 immunocompetence, such that more symmetric, but likely also larger individuals are expected  
8 to better fend off internal parasites such as *Entomophthora* (see e.g. Rantala et al., 2000,  
9 2004, 2007 and Yourth et al., 2002, for various insect species).

10

## 11 **Material and Methods**

12

### 13 **Study species**

14 Yellow dung flies occur throughout the northern hemisphere and are particularly common  
15 around cow pastures in central Europe. The species prefers cooler climates. In lowland central  
16 Europe, each year has a spring (March – June) and an autumn season (September –  
17 November), while during the hot midsummer (July and August) the flies largely disappear  
18 from the pastures due to their heat sensitivity (Blanckenhorn, 2009).

19 Adult *S. stercoraria* are sit-and-wait predators of small flying insects, from which they  
20 extract protein to produce sperm and eggs (Foster, 1967). Females spend most of their time  
21 foraging for nectar and prey in the vegetation surrounding pastures. About once a week they  
22 visit fresh cattle (or other) dung to deposit a clutch of eggs. Larvae feed on and develop in the  
23 dung. Multiple males typically wait at the dung pat to mate with incoming females.

24 Copulation usually takes place in the surrounding grass or on the dung pat; during the ensuing  
25 oviposition the male guards the female against other competitors (Parker, 1970). Competition  
26 among males for females is very strong as the operational sex ratio is highly male biased

1 (Jann et al., 2000). Larvae face unpredictable spatio-temporal variation in local temperatures,  
2 dung (i.e. food) quality and quantity, intra- and inter-specific competition, and dung drying,  
3 all factors that ultimately largely determine their phenotypic adult body size. Towards the end  
4 of the season the flies have to reach the overwintering pupal stage before the first winter frost  
5 (Blanckenhorn, 2009).

## 6 7 **Fly sampling**

8  
9 I sampled our population in Fehraltorf near Zurich (N47°52', E8°44') roughly once a month  
10 between April and November 2002 (8 seasonal samples; total of  $N = 541$  flies). Each time I  
11 sampled one randomly selected but otherwise representative fresh dung pat, collecting all  
12 single and paired flies on and ca. 20 cm around the pat to bring them alive to the laboratory.  
13 As virtually no unpaired females occur at a pat in the field because competition for mates is  
14 so intense, the number of pairs corresponds to the number of females present, and the  
15 proportion of paired males corresponds to the operational sex ratio (females / males).

## 16 17 **Laboratory procedures**

18 Although dead flies infected with the fungus were occasionally found on and around the  
19 pasture, these were too rare and haphazard to be sampled systematically. Instead, all collected  
20 flies were kept alive in the laboratory in single 100 ml bottles with sugar and water for up to  
21 two weeks. Infected flies would develop the fungus within few days and eventually die; non-  
22 infected, recovered or resistant flies would not. Females received dung to oviposit one clutch  
23 of eggs, which was counted.

24 In the end, work study students measured left and right wing length as well as fore, mid  
25 and hind tibia length of each fly. Mean values for these paired traits were subsequently  
26 calculated, as well as signed FA as  $(L - R)$ , unsigned FA as  $(|L - R|)$  (both in mm) and  
27 unsigned, size-corrected FA as  $(|L - R|) / \text{mean}(L, R)$  in %, as suggested by Palmer &

1 Strobeck (1986). Paired traits were measured twice blindly by the same person to estimate  
2 measurement error relative to fluctuating asymmetry (Palmer & Strobeck, 1986), and to  
3 calculate the repeatability of all trait measurements (Becker, 1992). All measurements were  
4 taken with a binocular microscope at 16x magnification.

5

## 6 **Statistical analysis**

7 For each monthly sample, and overall, I calculated standardized viability selection  
8 differentials (= gradients) for both sexes (binary variable: dead/alive = infected/uninfected),  
9 sexual selection differentials for males (binary: mated/unmated), and fecundity selection  
10 gradients for females based on their clutch size, using standard methods (Lande & Arnold,  
11 1983; Arnold & Wade, 1984a,b; Brodie *et al.*, 1995). It turns out that almost all females that  
12 developed the fungus and eventually died in the laboratory did not lay any eggs, so fecundity  
13 selection coefficients only refer to healthy (uninfected) females. We calculated selection  
14 coefficients for each trait separately (4 morphological and 4 asymmetry traits), and  
15 additionally for the first principal component (PC) of all (mean) appendages signifying a  
16 compound index of body size, separately for females and males.

17 Because the sizes of all appendages were highly positively correlated, and because FA and  
18 size are mathematically related (see above), we calculated only univariate linear ( $\beta_{uni}$ ) and  
19 corresponding non-linear ( $\gamma_{uni}$ ) selection coefficients. To do so, for each seasonal sample we  
20 produced standardized  $z$ -scores for trait  $x$  by subtracting the sample mean from each value  
21 and dividing by the standard deviation:  $z_i = (x_i - \bar{x}) / SD_x$ . Relative survival or male pairing  
22 success was computed as absolute survival or pairing success (1 or 0) divided by the sample  
23 proportion of survived flies or mated males, respectively (Brodie & Janzen, 1996). We used  
24 the univariate model of relative fitness on standardized body size  $w' = c + \beta_{uni}z$  to estimate the



1 linear selection intensities, and the corresponding quadratic model  $w = c + \beta_1 z + 0.5\gamma_{\text{non}} z^2$  to  
2 estimate univariate non-linear selection intensities,  $\gamma_{\text{non}}$ . These linear coefficients (gradients)  
3 reflect the combined effects of direct and indirect selection on body size (Endler, 1986). The  
4 difference of the regression coefficients from a slope of zero (the null hypothesis of no  
5 selection) was tested. For estimation of the coefficients least-squares regression was applied,  
6 but for tests of significance logistic regression was used in case our measures of success were  
7 binary (viability and mating success: Brodie *et al.*, 1995).

8

## 9 **Results**

10 Fungus prevalence varied over the season and between the sexes. Infections (as high as 50%)  
11 were most common during the cooler and more humid periods at the beginning (spring) and  
12 the end of the season (autumn), whereas they were rare during the hotter summer (nearly 0%);  
13 females were more affected than males (significant sex by season interaction:  $\chi^2 = 29.80$ ;  $P <$   
14  $0.001$ ; Fig. 1). The probability of dying by fungal infection was unaffected by mean FA ( $\chi^2 =$   
15  $1.99$ ;  $P = 0.159$ ) but increased with fly body size ( $\chi^2 = 12.56$ ;  $P < 0.001$ ; Table 1), an effect  
16 that however varied among seasonal samples ( $\chi^2 = 12.55$ ;  $P < 0.001$ ) but not between the  
17 sexes ( $\chi^2 = 0.27$ ;  $P = 0.602$ ).

18 Fecundity selection (based on clutch size) on female body size was significantly positive,  
19 as is typical in this species (Jann *et al.*, 2000; Kraushaar & Blanckenhorn, 2002). The  
20 intensity of fecundity selection, i.e. the slope relating relative clutch size to standardized body  
21 size (PC), varied significantly but unsystematically over the season (Table 1;  $F_{6,109} = 3.50$ ,  $P$   
22  $= 0.03$ ). These estimates refer only to uninfected flies because all females infected with the  
23 fungus died before laying eggs, and therefore do not estimate fecundity selection exerted by  
24 the fungus beyond the parasite's effect on adult mortality.

1 As usual in yellow dung flies, larger males had a mating advantage (Jann et al., 2000;  
2 Kraushaar & Blanckenhorn, 2002; Blanckenhorn et al., 2003; main effect of body size (PC):  
3  $\chi^2 = 14.23$ ;  $P < 0.001$ ), while mean FA of all paired appendages did not affect male mating  
4 success ( $\chi^2 = 1.17$ ;  $P = 0.279$ ; Table 1; Fig. 2). Except for one seasonal sample on 29 May, the  
5 large male advantage was consistent throughout the season such that sexual selection intensity  
6 did not significantly vary across the season (body size by season interaction:  $\chi^2 = 0.11$ ;  $P =$   
7  $0.920$ ; Table 1; Fig. 2). Interestingly, this pattern of positive sexual selection was nullified by  
8 fungal infection in those 28 (of a total of 47) infected males (of a total of 370 males, of which  
9 148 had a mate) found mating in the field that later succumbed to the fungus (main effect of  
10 fungal infection:  $\chi^2 = 7.61$ ;  $P = 0.006$ ; Fig. 3).

11 Table 1 gives directional (linear) selection coefficients,  $\beta$ , for the overall sample. (Seasonal  
12 values are given in the appendix.) Nonlinear (quadratic) selection coefficients,  $\gamma$ , were mostly  
13 low and not significant and are therefore not presented in Table 1. The only exception was  
14 female fecundity selection on body size, for which  $\gamma = 0.056 \pm 0.025$  was significantly  
15 positive, signifying accelerating selection (which has been reported before: Blanckenhorn,  
16 2007, 2009). Leg and wing lengths were expectedly highly correlated in both sexes (range of  
17 bivariate correlations:  $r = 0.887$  to  $0.972$ ), whereas FA of the legs and wings were largely  
18 uncorrelated (range:  $r = -0.024$  to  $+0.215$ ). Measurement of all paired traits was generally  
19 repeatable using our methods ( $R = 0.83 - 0.97$ ), which was also true for asymmetry ( $R = 0.53$   
20  $- 0.61$ ), so that FA could be discerned from measurement error (all side by individual  
21 interactions  $P < 0.01$ ), fulfilling the criteria of proper FA assessment (Palmer & Strobeck,  
22 1986; Knierim et al., 2007).

23

## 1 **Discussion**

2 At our Swiss study population, the entomophagous fungal parasite *Entomophthora*  
3 *scatophagae*, which has been described as a specific parasite of adult yellow dung flies at  
4 several sites in Europe and North America (Hammer, 1941; Steinkraus & Kramer, 1988;  
5 Maitland, 1994; Steenberg et al., 2001), shows high and generally fatal infection rates of up to  
6 50% during the cooler and more humid periods of the year. I here documented that this  
7 fungus exerts relatively strong and consistent negative viability selection on female and male  
8 adult body size in *S. stercoraria* (Table 1). Fungal infection further nullifies the usual large  
9 male mating advantage in sexual selection (Borgia, 1982; Jann *et al.* 2000; Blanckenhorn et  
10 al., 2003; Fig. 3), but does not affect female fecundity beyond its impact on mortality. This  
11 represents the first evidence demonstrating viability disadvantages of large yellow dung flies  
12 mediated by a parasite, which is generally rare in animals and particularly invertebrates  
13 (Blanckenhorn, 2000; Kingsolver & Pfennig, 2004; Gotanda et al., 2015). These results  
14 complement previous evidence of viability disadvantages of large flies at the juvenile stage,  
15 and lend further credence to the notion that the male-biased sexual size dimorphism of yellow  
16 dung flies is indeed at evolutionary equilibrium (Blanckenhorn, 2007).

17 This study is merely phenomenological, so I could not assess mechanisms. Nonetheless, I  
18 speculate that the reduced parasite resistance of large flies signifies a trade-off between body  
19 size and immunity (Rantala & Roff, 2005; Schwarzenbach & Ward, 2006; Cotter et al., 2008).  
20 Based on age grading by wing injuries, Burkhard et al. (2002) found that adult age (i.e.  
21 longevity) of yellow dung flies in the field tends to be positively related to body size. Energy  
22 reserves also scale positively with body size (Reim et al., 2006; Blanckenhorn et al., 2007)  
23 and positively influence mating success (Blanckenhorn et al., 2003). Adult longevity under  
24 most environmental circumstances, including complete starvation, can therefore generally be  
25 expected to increase with body size on physiological grounds. One possible mechanism

1 selecting against large body size is (positively) size-selective predation and/or parasitism  
2 (Blanckenhorn, 2000). However, beyond expectations of a rough positive correlation between  
3 predator and prey size (Brose et al., 2006; Vucic-Pestic et al., 2010), evidence for systematic  
4 size-selectivity of predators is generally weak at best, also for yellow dung flies  
5 (Blanckenhorn, 2000; Blanckenhorn et al., unpublished data). Size-selective parasitism has  
6 been reported in some parasitoids (McGregor & Roitberg, 2000), but otherwise few data exist  
7 (Zuk & Kolluru, 1998; Blanckenhorn, 2000). Rather than invoking selective attraction of the  
8 parasite according to host size, I suspect that the ability to combat the parasite is  
9 compromised in larger flies due to their generally greater absolute energy demands in a  
10 stressful environment (trade-off hypothesis: Rantala & Roff, 2005; Reim et al., 2006;  
11 Schwarzenbach & Ward, 2006, 2007; Cotter et al., 2008). Females were infected more by the  
12 parasite here (Fig. 1), probably related to their generally greater reproductive burden (i.e. the  
13 cost of producing expensive eggs rather than cheap sperm; cf. Nunn et al., 2009; but see e.g.  
14 Rantala et al., 2007 for opposite results). Nevertheless, the standard sex differences in  
15 reproductive (energetic) costs should be somewhat offset by the male-biased sexual size  
16 dimorphism of yellow dung flies, which implies relatively greater costs in producing and  
17 maintaining the larger and condition-dependent male body size (Blanckenhorn, 2000, 2007),  
18 and might explain why size-dependent viability selection here turned out to be steeper in  
19 males (Table 1). Yellow dung fly females indeed produce higher heritable levels than males  
20 of phenoloxidase (PO; Schwarzenbach et al., 2005), one of the central mediators of insect  
21 immunity (Schmid-Hempel, 2005; Rolff & Reynolds, 2009; González-Santoyo &  
22 CórdobaAguilar, 2012), and higher PO levels decrease adult longevity in this species,  
23 demonstrating a trade-off (Schwarzenbach & Ward, 2006). However, higher PO levels did not  
24 lead to greater resistance against mites or another fungus (Schwarzenbach & Ward, 2007),  
25 and PO is also unrelated to body size in *S. stercoraria* (Schwarzenbach et al., 2005). Overall,

1 therefore, the evidence in favor of immunity mediating the higher mortality of large-bodied  
2 dung flies here remains limited.

3 In contrast to body size, fluctuating asymmetry (FA) of legs and wings influenced none of  
4 the fitness components investigated here (contrary to Liggett et al., 1993, but confirming  
5 Blanckenhorn et al.'s, 2003, earlier sexual selection study). I had expected, based on evidence  
6 in other animals (Rantala et al., 2000, 2004), that low FA would be a signal of greater  
7 immunocompetence augmenting resistance against parasites, but this was not found. It is not  
8 unlikely that FA is a bad indicator of developmental stability in general, as various reviews  
9 have revealed no clear verdict based on the available evidence on this question, so the entire  
10 concept remains controversial (Møller & Thornhill, 1997; Møller & Swaddle, 1997; Palmer,  
11 2000; various articles in Polak, 2003; Van Dongen, 2006; Knierim et al., 2007). In yellow  
12 dung flies, beyond Liggett et al. (1993) the evidence for a role of FA in sexual selection is  
13 close to nil (Blanckenhorn et al., 2003; Blanckenhorn & Hosken, 2003; this study). What  
14 remains is that FA reliably indicates at least hot temperature stress in this species (Hosken et  
15 al., 2000; Blanckenhorn & Hosken, further unpublished data), even though Floate & Coughlin  
16 (2010) concluded that FA is no good biomarker of toxic chemical residues in cattle dung. As  
17 the survival of flies infected with the fierce entomophagous fungus *Entomophthora*  
18 *scatophagae* here was related to the size (discussed above) but not the fluctuating asymmetry  
19 of wings and legs, I conclude that FA is no good indicator of immunocompetence in yellow  
20 dung flies either (Rantala et al., 2000, 2004, 2007; Rantala & Roff, 2005; Yourth et al., 2002;  
21 Schwarzenbach & Ward, 2006; Cotter et al., 2008).

22

## 23 **Acknowledgements**

24 I thank the University of Zurich and the Swiss National Fund for financial support over the  
25 years, and Ana, Lukas, Nils and Patricia for doing the measurements.

## 1 **References**

2

3 Arnold, S. J., & Wade, M.J. 1984a. On the measurement of natural and sexual selection:  
4 applications. *Evolution* **38**: 720-734.

5 Arnold, S. J., & Wade, M.J. 1984b. On the measurement of natural and sexual selection:  
6 theory. *Evolution* **38**: 709-719.

7 Becker, W.A. 1992. *Manual of Quantitative Genetics. 5th edition*. Academic Enterprises,  
8 Pullman.

9 Blanckenhorn, W.U. 1997. Altitudinal life history variation in the dung flies *Scathophaga*  
10 *stercoraria* and *Sepsis cynipsea*. *Oecologia* **109**: 342-352.

11 Blanckenhorn, W.U. 2000. The evolution of body size: what keeps organisms small? *Quart.*  
12 *Rev. Biol.* **75**: 385-407.

13 Blanckenhorn, W.U. 2007. Case studies of the differential equilibrium hypothesis of sexual  
14 size dimorphism in dung flies. Pages 106-114 in: D.J. Fairbairn, W.U. Blanckenhorn, T.  
15 Székely, eds. *SEX, SIZE AND GENDER ROLES. Evolutionary Studies of Sexual Size*  
16 *Dimorphism*. Oxford University Press, Oxford.

17 Blanckenhorn, W.U. 2009. Causes and consequences of phenotypic plasticity in body size:  
18 the case of the yellow dung fly *Scathophaga stercoraria* (Diptera: Scathophagidae). Pages  
19 369-422 in: D.W. Whitman, T.N. Ananthkrishnan, eds. *Phenotypic plasticity of insects:*  
20 *Mechanism and consequences*. Science Publishers, Enfield NH, USA.

21 Blanckenhorn, W.U. 2015. Yellow dung fly body size evolution in the field: response to  
22 climate change? *Evolution* **69**: 2227-2234.

23 Blanckenhorn, W.U. & M. Demont. 2004. Bergmann and converse Bergmann latitudinal  
24 clines in arthropods: two ends of a continuum? *Integr. Comp. Biol.* **44**: 413-424.

25 Blanckenhorn, W.U., Kraushaar, U. & Reim, C. 2003. Sexual selection on morphological and  
26 physiological traits and fluctuating asymmetry in the yellow dung fly. *J. Evol. Biol.* **16**:  
27 903-913.

28 Blanckenhorn, W.U., Fanti, J. & Reim, C. 2007. Size-dependent energy reserves, energy  
29 utilization and longevity in the yellow dung fly. *Physiological Entomology* **32**: 372-381.

30 Blanckenhorn, W.U. & Hosken, D.J. 2003. The heritability of three condition measures in the  
31 yellow dung fly. *Behav. Ecol.* **14**: 612-618.

- 1 Borgia, G. 1982. Experimental changes in resource structure and male density: size-related  
2 differences in mating success among male *Scathophaga stercoraria*. *Evolution* **36**: 307-  
3 315.
- 4 Brodie III., E.D. & Janzen, F.J. 1996. On the assignment of fitness values in statistical  
5 analyses of selection. *Evolution* **50**: 437-442.
- 6 Brodie III., E.D., Moore, A.J. & Janzen, F.J. 1995. Visualizing and quantifying natural  
7 selection. *Trends Ecol. Evol.* **10**: 313-318.
- 8 Brose U, et al. 2006. Consumer-resource body-size relationships in common food webs.  
9 *Ecology* **87**: 2411-2417.
- 10 Burkhard, D.U., Ward, P.I. & Blanckenhorn, W.U. 2002. Using age-grading by wing injuries  
11 to estimate size-dependent adult survivorship in the field: a case study of the yellow dung  
12 fly *Scathophaga stercoraria*. *Ecol. Entomol.* **27**: 514-520.
- 13 Calder, W.A. 1984. *Size, Function, and Life History*. Harvard University Press, Cambridge.
- 14 Cotter, S., Myatt, J., Benskin, C. & Wilson, K. 2008. Selection for cuticular melanism reveals  
15 immune function and life-history trade-offs in *Spodoptera littoralis*. *J. Evol. Biol.*, **21**:  
16 1744-1754.
- 17 Cox, R.M. & Calsbeek, R. 2009. Sexually antagonistic selection, sexual dimorphism and the  
18 resolution of intralocus sexual conflict. *Am. Nat.* **173**: 176-187.
- 19 Endler, J.A. 1986. *Natural Selection in the Wild*. Princeton University Press, Princeton.
- 20 Fairbairn, D.J. 1997. Allometry for sexual size dimorphism: Pattern and process in the  
21 coevolution of body size in males and females. *Ann. Rev. Ecol. Syst.* **28**: 659-687.
- 22 Floate, K.D. & Coghlin, P. 2010. No support for fluctuating asymmetry as a biomarker of  
23 chemical residues in livestock dung. *Can. Entomol.* **152**: 354-368.
- 24 Foster, W. 1967. Hormone-mediated nutritional control of sexual behavior in male dung flies.  
25 *Science* **158**: 1596-1597.
- 26 González-Santoyo, I. & Córdoba-Aguilar, A. 2012. Phenoloxidase: a key component of the  
27 insect immune system. *Entomo. Exp. Appl.* **142**: 1-16.
- 28 Gotanda, K., Correa, C., Turcotte, M.M., Rolshausen, G. & Hendry, A.P. 2015. Linking  
29 macro-trends and micro-rates: re-evaluating micro-evolutionary support for Cope's rule.  
30 *Evolution* **69**: 1345-1354.

- 1 Hammer. O. 1941. Biological and ecological investigations on flies associated with  
2 pasturing cattle and their excrement. *Vidensk. Medd. Dansk Naturh. Foren.* **105**: 140-  
3 393.
- 4 Honek, A. 1993. Intraspecific variation in body size and fecundity in insects: a general  
5 relationship. *Oikos* **66**: 483-492.
- 6 Hosken, D.J., Blanckenhorn, W.U. & Ward, P.I. 2000. Developmental stability in the yellow dung  
7 fly (*Scathophaga stercoraria*): fluctuating asymmetry, heterozygosity and environmental stress.  
8 *J. Evol. Biol.* **13**: 919–926.
- 9 Jann, P., Blanckenhorn, W. U. & Ward, P. I. 2000. Temporal and microspatial variation in the  
10 intensities of natural and sexual selection in the yellow dung fly *Scathophaga stercoraria*.  
11 *J. evol. Biol.* **13**: 927-938.
- 12 Kingsolver, J.G., Hoekstra, H.E., Hoekstra, J.M., Berrigan, D., Vignieri, S.N., Hill, C.E.,  
13 Hoang, A., Gibert, P. & Beerli, P. 2001. The strength of phenotypic selection in natural  
14 populations. *Am. Nat.* **157**: 245-261.
- 15 Kingsolver, J.G. & D.W. Pfennig. 2004. Individual-level selection as a cause of Cope’s rule  
16 of phyletic size increase. *Evolution* **58**:1608-1612.
- 17 Knierim, U., Van Dongen, S., Forkman, B., Tuytens, F.A.M., Špinka, M., Campo, J.L., &  
18 Weissengruber, G.E. 2007. Fluctuating asymmetry as an animal welfare indicator — A  
19 review of methodology and validity. *Physiol Behav.* **92**: 398-421.
- 20 Kraushaar, U. & Blanckenhorn, W.U. 2002. Population variation in sexual selection and its  
21 effect on body size allometry in two species of flies with contrasting sexual size  
22 dimorphism. *Evolution* **56**: 307-321.
- 23 Lande, R. & Arnold, S.J. 1983. The measurement of selection on correlated characters.  
24 *Evolution* **37**: 1210-1226.
- 25 Liggett, A. C., Harvey, I.F. & Manning, J.T. 1993. Fluctuating asymmetry in *Scathophaga*  
26 *stercoraria* L.: successful males are more symmetrical. *Anim. Behav.* **45**: 1041-1043.
- 27 Maitland, D.P. 1994. A parasitic fungus infecting yellow dungflies manipulates host perching  
28 behaviour. *Proc. Roy. Soc. Lond. B* **258**: 187-193.



- 1 McGregor, R. R. & Roitberg, B.D, 2000. Size-selective oviposition by parasitoids and the  
2 evolution of life-history timing in hosts: Fixed preferences vs. frequency-dependent host  
3 selection. *Oikos* **89**: 305-312.
- 4 Merilä, J. & Hendry, A.P. 2014. Climate change, adaptation, and phenotypic plasticity: the  
5 problem and the evidence. *Evol. Appl.* **7**: 1-14.
- 6 Merilä, J., Sheldon, B.C. & Kruuk, L.E.B. 2001. Explaining stasis: microevolutionary studies  
7 in natural populations. *Genetica* **112-113**: 199-222.
- 8 Møller, A. P. 1993. A fungus infecting domestic flies manipulates sexual behaviour of its  
9 host. *Behav. Ecol. Sociobiol.* **33**: 403-407.
- 10 Møller, A.P. & Swaddle, J.P. 1997. *Asymmetry, Developmental Stability and Evolution*.  
11 Oxford University Press, Oxford.
- 12 Møller, A.P. & Thornhill, R. 1997. A meta-analysis of the heritability of developmental  
13 stability. *J. evol. Biol.* **10**: 1-16.
- 14 Mousseau, T.A. & Roff, D.A. 1987. Natural selection and the heritability of fitness  
15 components. *Heredity* **59**: 181-197.
- 16 Nielsen, C. & Hayek, A.E. 2006. Diurnal pattern of death and sporulation in *Entomophaga*  
17 *maimaiga*-infected *Lymantria dispar*. *Entomol. Exp. Appl.* **118**: 237-243.
- 18 Nunn, C.L., Lindenfors, P., Pursall, E.R. & Rolff, J. 2009. On sexual dimorphism in immune  
19 function. *Phil. Trans. Roy. Soc. Lond. B* **364**: 61-69.
- 20 Palmer, A.R. 2000. Quasi-replication and the contract of error: lessons from sex ratios,  
21 heritabilities and fluctuating asymmetry. *Ann. Rev. Ecol. Syst.* **31**: 441-480.
- 22 Palmer, A. R. & Strobeck, C. 1986. Fluctuating asymmetry: measurement, analysis, patterns.  
23 *Ann. Rev. Ecol. Syst.* **17**: 391-421.
- 24 Parker, G.A. 1970. The reproductive behaviour and the nature of sexual selection in  
25 *Scathophaga stercoraria* L. (Diptera: Scathophagidae) II. The fertilization rate and the  
26 spatial and temporal relationships of each sex around the site of mating and oviposition. *J.*  
27 *Anim. Ecol.* **39**: 205-228.
- 28 Parker, G.A. 1979. Sexual selection and sexual conflict. In: *Sexual Selection and*  
29 *Reproductive Competition in Insects* (N. S. Blum & N. A. Blum, eds), pp. 123-166.  
30 Academic Press, New York.
- 31 Preziosi, R.F. & Fairbairn, D.J. 2000. Lifetime selection on adult body size and components  
32 of body size in a waterstrider: opposing selection and maintenance of sexual size  
33 dimorphism. *Evolution* **54**: 558-566.

- 1 Polak, M. (ed.) 2003. *Developmental instability. Causes and consequences*. Oxford: Oxford  
2 University Press.
- 3 Rantala, M.J. & Roff, D.A. 2005. An analysis of trade-offs in immune function, body size and  
4 development time in the Mediterranean field cricket, *Gryllus bimaculatus*. *Funct. Ecol.* **19**:  
5 323-330.
- 6 Rantala, M.J., Koskimäki, J., Taskinen, J., Tynkkynen, K. & Suhonen, J. 2000.  
7 Immunocompetence, developmental stability and wing spot size in the damselfly  
8 *Calopteryx splendens* L. *Proc. Roy. Soc. Lond. B* **267**: 2453–2457.
- 9 Rantala, M.J., Ahtiainen, J.J. & Suhonen, J. 2004. Fluctuating asymmetry and immune  
10 function in a field cricket. *Oikos* **109**: 479–484.
- 11 Rantala, M.J., Roff, D.A. & Rantala, L.M. 2007. Forceps size and immune function in the  
12 earwig *Forficula auricularia*. *Biol. J. Linn. Soc.* **90**: 509-516.
- 13 Reim, C., Teuschlm Y, & Blanckenhorn, W.U. 2006. Size-dependent effects of larval and  
14 adult food availability on reproductive energy allocation in the yellow dung fly. *Funct.*  
15 *Ecol.* **20**: 1012-1021.
- 16 Rensch, B. 1950. Die Abhängigkeit der relativen Sexualdifferenz von der Körpergröße. *Bonn.*  
17 *Zoolog. Beitr.* **1**: 58-69.
- 18 Roff, D.A. 1992. *The Evolution of Life Histories*. Chapman & Hall, New York.
- 19 Rolff, J. & Reynolds, S. 2009. *Insect Infection and Immunity: Evolution, Ecology, and*  
20 *Mechanisms*. Oxford University Press.
- 21 Schilthuizen, M. & Kellermann, V. 2014. Contemporary climate change and terrestrial  
22 invertebrates: evolutionary versus plastic changes. *Evol. Appl.* **7**: 56–67.
- 23 Schmid-Hempel, P. 2005. Evolutionary ecology of insect immune defenses. *Annu. Rev.*  
24 *Entomol.* **50**: 529-551.
- 25 Schwarzenbach, G.A., Hosken, D.J. & Ward, P.I. 2005. Sex and immunity in the yellow dung  
26 fly *Scathophaga stercoraria*. *J. evol. Biol.* **18**: 455-463.
- 27 Schwarzenbach, G.A. & Ward, P.I. 2006. Responses to selection on phenoloxidase activity in  
28 yellow dung flies. *Evolution* **60**: 1612-1621.
- 29 Schwarzenbach, G.A. & Ward, P.I. 2007. Phenoloxidase activity and pathogen resistance in  
30 the yellow dung fly *Scathophaga stercoraria*. *J. evol. Biol.* **20**: 2192-2199.

- 1 Schmidt-Nielsen, K. 1984. *Scaling. Why is animal size so important?* Cambridge University  
2 Press, Cambridge.
- 3 Sigurjónsdóttir, H. & Snorrason, S.S. 1995. Distribution of male yellow dungflies around  
4 oviposition sites: the effect of body size. *Ecol. Entomol.* **20**: 84-90.
- 5 Steenberg, T., Jespersen, J.B., Jensen, K.-M.V., Nielsen, B.O. & Humber, R. A. 2001.  
6 Entomopathogenic fungi in flies associated with pastured cattle in Denmark. *J. Invert.*  
7 *Pathol.* **77**: 186-197.
- 8 Steinkraus, D.C. & Kramer, J.P. 1988. *Entomophthora scatophagae*, a fungal pathogen of the  
9 yellow dung fly, *Scatophaga stercoraria*. *Mycotaxon* **32**: 105-113.
- 10 Stoks, R., Geerts, A.N. & de Meester, L. 2014. Evolutionary and plastic responses of  
11 freshwater invertebrates to climate change: realized patterns and future potential. *Evol.*  
12 *Appl.* **7**: 42-55.
- 13 Swaddle, J.P. 1997. Developmental stability and predation success in an insect predator-prey  
14 system. *Behav. Ecol.* **8**: 433-436.
- 15 Van Dongen, S. 2006. Fluctuating asymmetry and developmental instability in evolutionary  
16 biology: past, present and future. *J. Evol. Biol.* **19**: 1727-43.
- 17 Vucic-Pestic, O., Rall, B.C., Kalinkat, G. & Brose, U. 2010. Allometric functional response  
18 model: Body masses constrain interaction strengths. *J. Anim. Ecol.* **79**: 249-256.
- 19 Yourth, C.P., Forbes, M. & Smith, B.P. 2002. Immune expression in a damselfly is related to  
20 time of season, not to fluctuating asymmetry or host size. *Ecol. Entomol.* **27**: 123-128.
- 21 Zuk, M. & Kolluru, G.R. 1998. Exploitation of sexual signals by predators and parasitoids.  
22 *Quart. Rev. Biol.* **73**: 415-438.
- 23

1 **Table 1:** Overall intensities ( $\beta \pm 95\%$  CI) of female and male adult viability selection ( $N_f =$   
2 171 &  $N_m = 370$ ) exerted by the fungus *Entomophthora*, female fecundity selection (clutch  
3 size;  $N_f = 126$ ), and male sexual selection (pairing success;  $N_m = 370$ ) for one Swiss  
4 population of yellow dung flies (*Scathophaga stercoraria*) over the season 2002. Significant  
5 coefficients are in bold ( $P < 0.05$ ).

6

| Trait             | Adult viability |        |               |        | Female fecundity |        | Male mating success |        |
|-------------------|-----------------|--------|---------------|--------|------------------|--------|---------------------|--------|
|                   | $\beta_f$       | 95% CI | $\beta_m$     | 95% CI | $\beta$          | 95% CI | $\beta$             | 95% CI |
| Hind tibia length | -0.158          | 0.305  | <b>-0.306</b> | 0.252  | <b>0.185</b>     | 0.027  | <b>0.259</b>        | 0.149  |
| Mid tibia length  | -0.089          | 0.310  | <b>-0.328</b> | 0.277  | <b>0.179</b>     | 0.029  | <b>0.228</b>        | 0.150  |
| Fore tibia length | -0.196          | 0.304  | -0.221        | 0.251  | <b>0.174</b>     | 0.029  | <b>0.226</b>        | 0.159  |
| Wing length       | -0.254          | 0.307  | <b>-0.324</b> | 0.248  | <b>0.179</b>     | 0.029  | <b>0.267</b>        | 0.147  |
| Overall PC size   | -0.099          | 0.292  | <b>-0.317</b> | 0.302  | <b>0.184</b>     | 0.029  | <b>0.253</b>        | 0.136  |
| Hind tibia FA     | -0.020          | 0.333  | -0.086        | 0.258  | -0.023           | 0.045  | 0.051               | 0.151  |
| Mid tibia FA      | 0.204           | 0.231  | 0.003         | 0.219  | -0.026           | 0.041  | 0.010               | 0.173  |
| Fore tibia FA     | -0.037          | 0.299  | 0.224         | 0.283  | -0.024           | 0.045  | 0.040               | 0.180  |
| Wing FA           | -0.187          | 0.321  | 0.046         | 0.279  | 0.037            | 0.045  | -0.041              | 0.168  |
| Mean FA           | 0.035           | 0.284  | 0.097         | 0.327  | -0.021           | 0.040  | 0.071               | 0.134  |

7

1 **Figure 1:** Proportion of male (filled squares) and female (open circles) flies infected by the  
2 fungus *Entomophthora* over the season 2002.

3

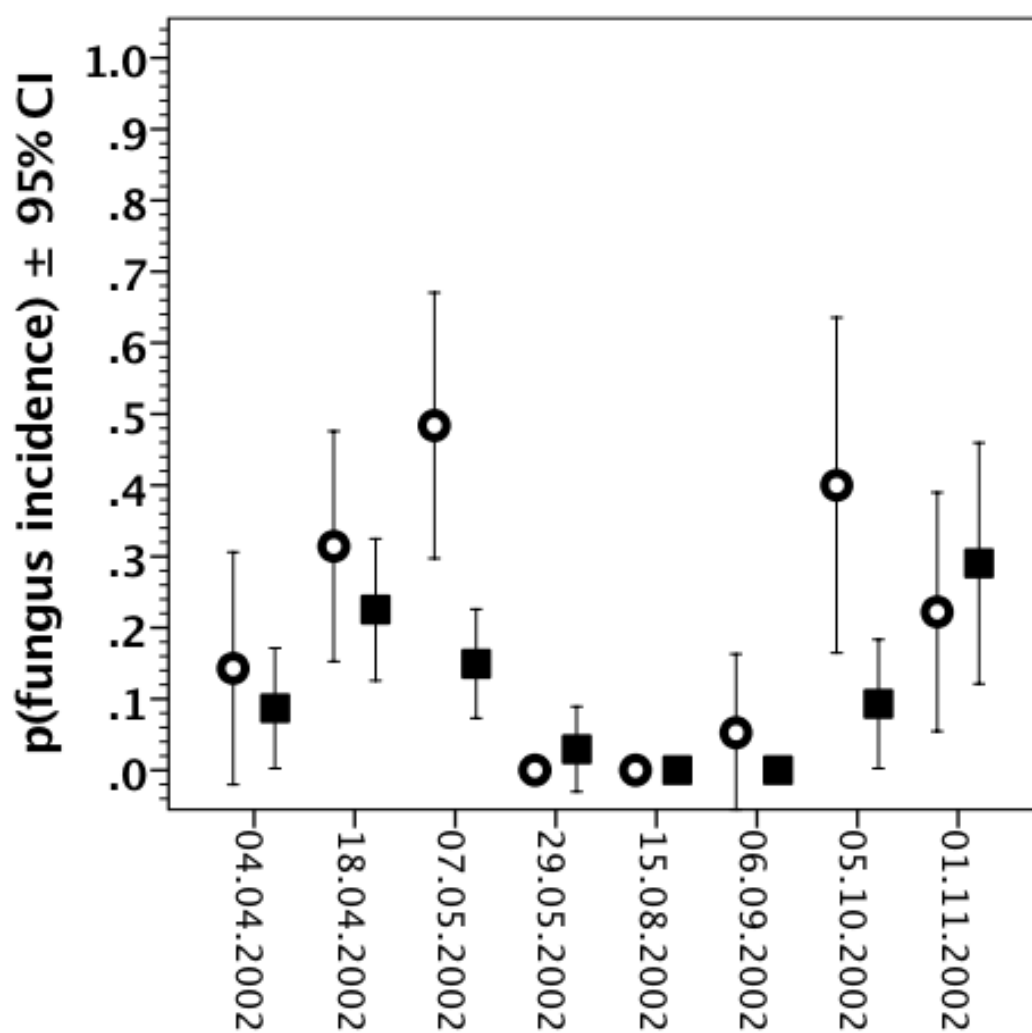

4  
5

1 **Figure 2:** Body size (top; here exemplified by wing length) and mean percentage of  
2 fluctuating asymmetry (FA; bottom) of all traits for unpaired (filled squares) and paired males  
3 (open squares) over the season.

4

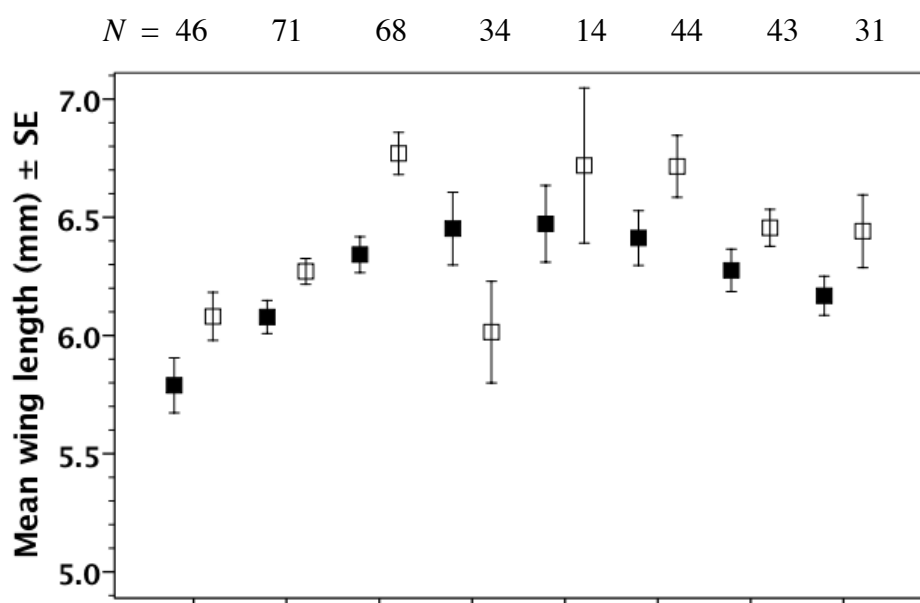

5

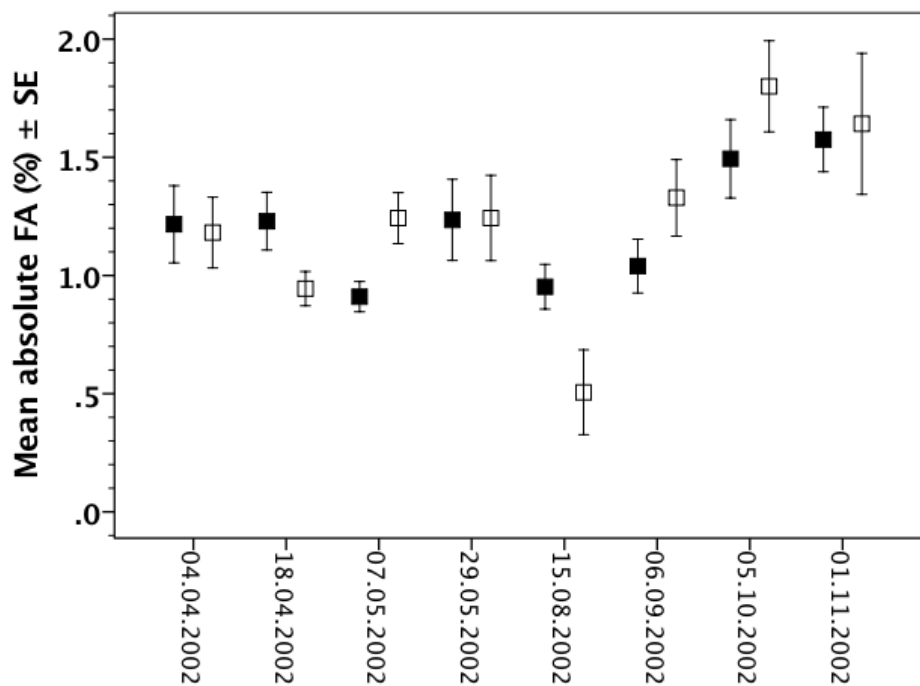

6

7

1 **Figure 3:** Body size (here exemplified by hind tibia length) of unpaired (filled squares) and  
2 paired males (open squares) when they were infected by the fungus or not (all seasonal  
3 samples combined).

4

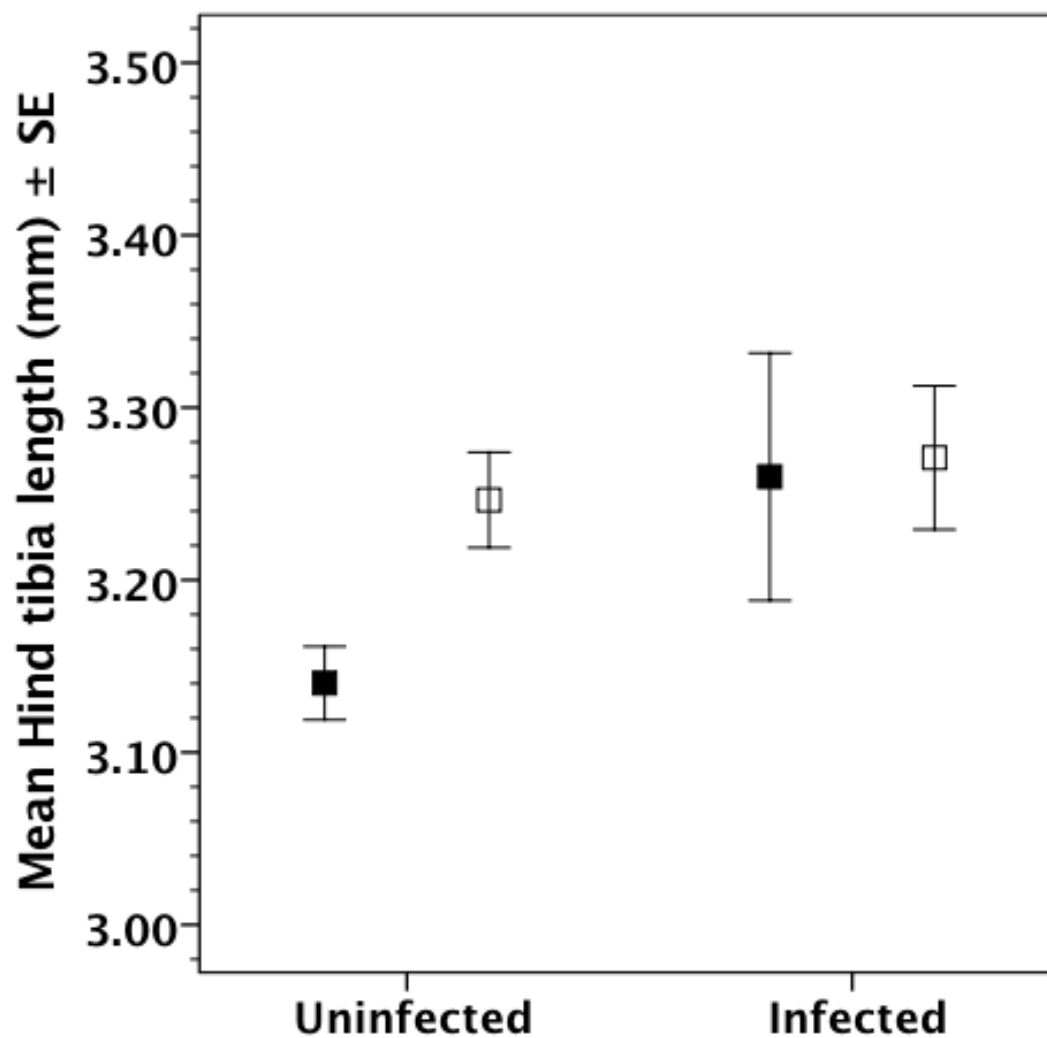

5
